# Supplementary material for: Decoupling between Translational Diffusion and Viscoelasticity in Transient Networks with Controlled Network Connectivity
Source: MDPI journal article supplement (doi:10.3390/gels8120830), 2022-12-16
Supplement: s1 [file s1]

## Supplementary Materials

# Decoupling between Translational Diffusion and Viscoelasticity in Transient Networks with Controlled Network Connectivity

Takuya Katashima <sup>1,\*</sup>, Ryunosuke Kobayashi <sup>1</sup>, Shohei Ishikawa <sup>1</sup>, Mitsuru Naito <sup>2</sup>, Kanjiro Miyata <sup>1,2</sup>,

Ung-il Chung <sup>1,3</sup>, and Takamasa Sakai <sup>1,4</sup>

1. Department of Bioengineering, School of Engineering, The University of Tokyo, 7-3-1 Hongo, Bunkyo-ku, Tokyo 113-8656, Japan
2. Department of Materials Engineering, Graduate School of Engineering, The University of Tokyo, 7-3-1 Hongo, Bunkyo-ku, Tokyo 113-8656, Japan
3. Center for Disease Biology and Integrative Medicine, Graduate School of Medicine, The University of Tokyo, 7-3-1, Hongo, Bunkyo-ku, Tokyo 113-8656, Japan
4. Department of Chemistry and Biotechnology, Graduate School of Engineering, The University of Tokyo, 7-3-1 Hongo, Bunkyo-ku, Tokyo 113-8656, Japan

*\* To whom correspondence should be addressed.*

E-mail: katashima@tetrapod.t.u-tokyo.ac.jp

TEL: +81-3-5841-1863

## 1. Comparison of viscoelasticity between Alexa-labeled and neat samples

Figure S1 shows the results of the dynamic viscoelasticity to compare the Alexa-labeled and neat Tetra-PEG slimes. Despite fluorescence modification, the viscoelastic spectra were well overlapped, suggesting that the effect of the end modification is negligible for viscoelasticity.

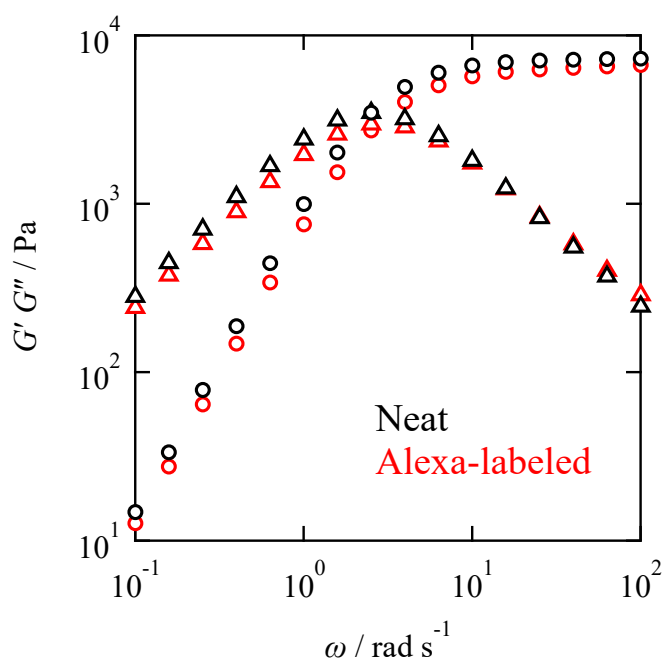

**Figure S1.** Storage (circles) and loss (triangles) moduli as a function of angular frequency for the neat and Alexa-labeled Tetra-PEG slimes with  $s = 0.5$  at  $30^\circ\text{C}$ .

## 2. Estimation of end-modification rate

Figure S2 shows the fluorescent intensity against the molar concentrations of Alexa Fluor™ 594 NHS ester (Alexa-NHS) and Alexa-modified Tetra-PEG-GDL estimated by the fluorometer. In both panels, the intensities showed linear relationships, obeying the Beer-Lambert law. According to the left panel, the molar contribution of the Alexa to the intensity is estimated to be  $3.04 \times 10^{10} \text{ L mol}^{-1}$ . On the other hand, from the right panel, the slope is estimated to be  $1.36 \times 10^7 \text{ L mol}^{-1}$ . Therefore, the modification rate of the end groups in tetra-armed PEG is evaluated to be 0.0444%.

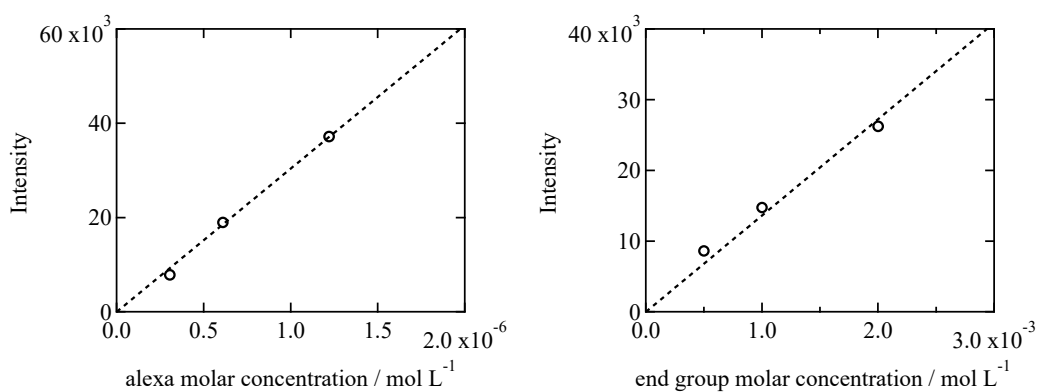

**Figure S2.** Fluorescent intensity as a function of Alexa-NHS concentration (left) and end group concentration of tetra-armed PEG (right).
